# Supplementary material for: Preparation of novel cerium( iv )-crosslinked carboxymethyl-β-cyclodextrin for efficient adsorption of the tetracycline antibiotic
Source: Royal Society of Chemistry journal article supplement (doi:10.1039/d5nj03090k), 2025-01-01
Supplement: d5nj03090k1.pdf [file d5nj03090k1.pdf]

**Supplementary Materials**

**Preparation of Novel Cerium(IV)-Crosslinked  
Carboxymethyl- $\beta$ -Cyclodextrin for Efficient Adsorption of  
Tetracycline Antibiotic**

Lin Li<sup>a,b</sup>, Shikai Xue<sup>a,b</sup>, Xin Li<sup>a,b</sup>, Linqi Liu<sup>b</sup>, Haiyan Wang<sup>b</sup>, Qiujun Lu<sup>b</sup>, Guoxing Yin<sup>b</sup>, Ningli  
Tang<sup>a\*</sup>, Fuyou Du<sup>a,b\*</sup>

<sup>a</sup> College of Chemistry and Bioengineering, Guilin University of Technology, Guilin 541004,  
China

<sup>b</sup> College of Biological and Chemical Engineering, Changsha University, Changsha 410022,  
China

\* Corresponding author: F. Du, N. Tang

Tel.: +86-731-84261506

Fax.: +86-731-84261382

E. mail: tangnl@glut.edu.cn (N. Tang)

dufu2005@126.com (F. Du)

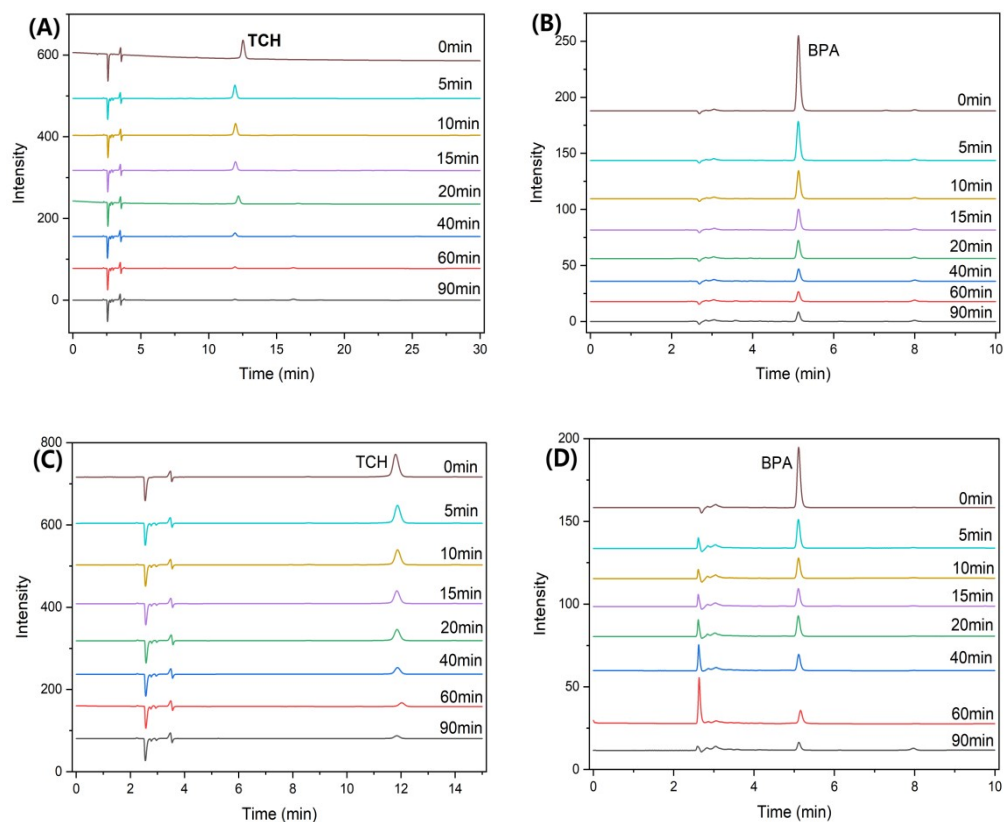

**Figure S1.** Typical Liquid chromatograms of TCH (A) and BPA (B) before and after adsorption with Ce/CM-β-CD in a unitary system; and typical Liquid chromatograms of TCH (C) and BPA (D) before and after adsorption with Ce/CM-β-CD in a binary system.

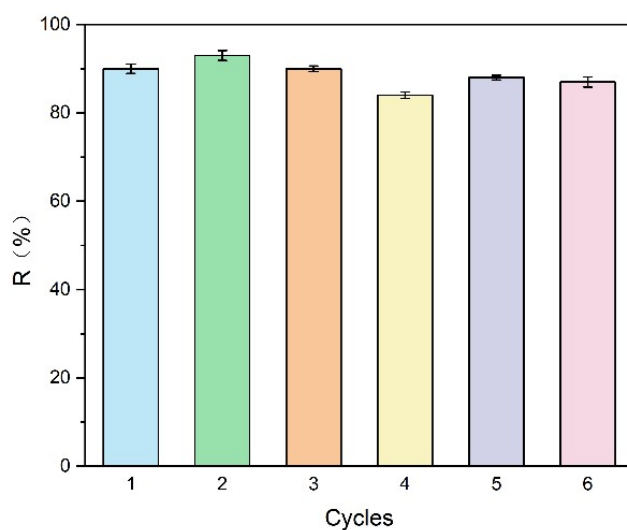

**Figure S2.** Experimental diagram of Ce/CM-β-CD desorption cycle

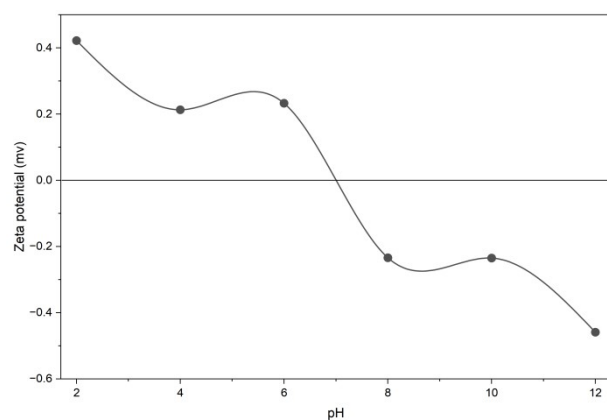

Figure S3 The zeta potential of Ce/CM- $\beta$ -CD at different pH

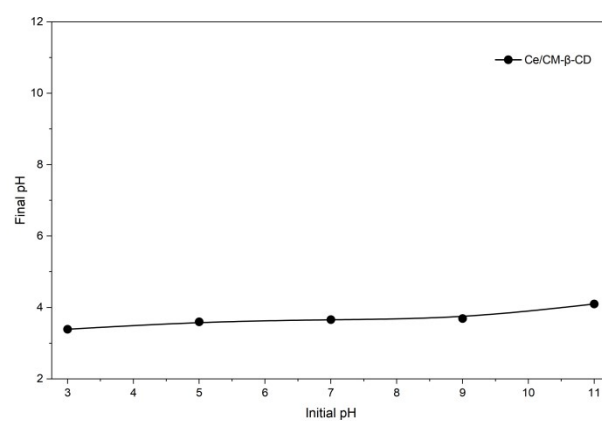

Figure S4 Equilibrium pH for Ce/CM- $\beta$ -CD
